# Supplementary material for: Coordination polymers of zinc with 2,2′-(2,3-bis-phenylsulfanylnaphthalene-1,4-yloxy)diacetic acid
Source: Royal Society of Chemistry journal article supplement (doi:10.1039/b819012g), 2009-01-01

Supplementary materials:

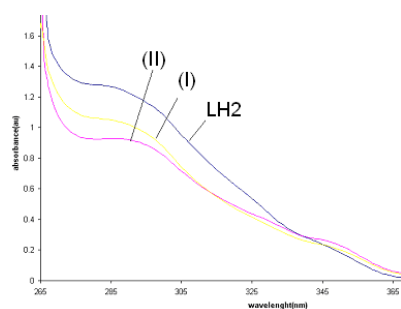

Supplementary Figure : UV-visible spectra of **LH2** with Ar = phenyl, **I** and **II** each of them in dimethylformamide( $10^{-3}$  M)

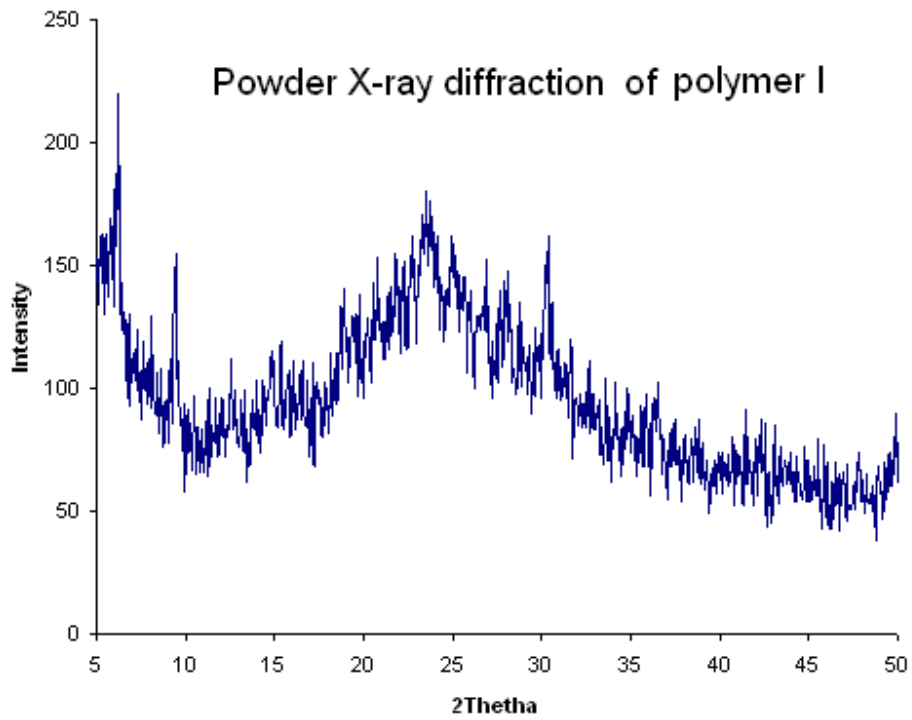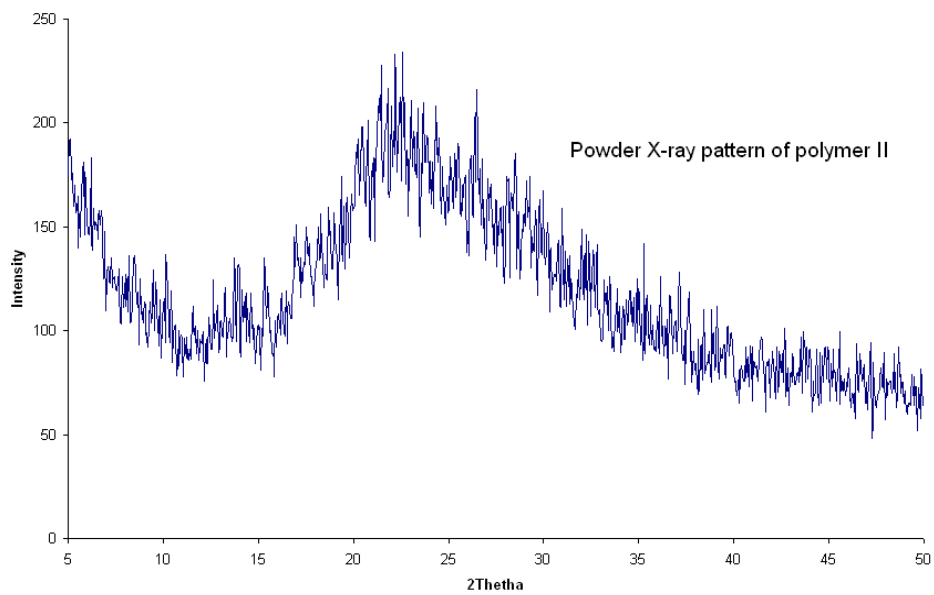

Supplement: b819012g.pdf [file b819012g.pdf]
